# Supplementary material
Source: bioRxiv or medRxiv preprint supplement (https://www.biorxiv.org/highwire/filestream/14585/field_highwire_adjunct_files/1/053041-2.pdf)
Supplement: Supplementary file [file 053041-2.pdf]

**Supplementary Table 1. RNA-Seq data overview**

| <b>Tissue</b>                                         | <b>Whole blood</b> | <b>Nasal epithelium</b> | <b>Lung epithelium</b> |
|-------------------------------------------------------|--------------------|-------------------------|------------------------|
| N                                                     | 19                 | 19                      | 49                     |
| Library preparation method                            | poly(A) enrichment | poly(A) enrichment      | ribo-depletion         |
| Number of read pairs, mean (std)                      | 48.5 (12.7)        | 57.2 (7.0)              | 37.8 (13.0)            |
| Number of mapped read pairs, mean (std), millions     | 40.3 (12.1)        | 49.7 (6.8)              | 28.9 (10.9)            |
| Number of singleton* reads ,mean (std), millions      | 2.5 (0.6)          | 2.9 (0.6)               | 3.3 (1.2)              |
| Number of unmapped read pairs**, mean (std), millions | 5.7 (1.5)          | 4.6 (2.9)               | 5.6 (3.2)              |

\*reads with one read from the pair mapped and another read from the pair unmapped

\*\* both reads from the pair are unmapped

**Supplementary Table 2. Genomic profile across tissues types and library preparation methods. Genomic profile is obtained based on both mapped and lost human RNA-Seq reads**

**A. Genomic profile obtained based on mapped RNA-Seq reads. Mapped human reads are identified as the RNA-Seq reads mapped to the reference genome and transcriptome (ENSEMBL hg19 build, ENSEMBL GRCh37 transcriptome) via tophat2.**

| <b>Tissue</b>                                | <b>Whole blood</b> | <b>Nasal epithelium</b> | <b>Lung epithelium</b> |
|----------------------------------------------|--------------------|-------------------------|------------------------|
| N                                            | 19                 | 19                      | 49                     |
| Library preparation method                   | poly(A) enrichment | poly(A) enrichment      | ribo-depletion         |
| Splice junction reads, %*, mean (std)        | 23.3% (3.3%)       | 29.8% (2.2%)            | 10.0% (3.3%)           |
| CDS reads %, mean (std)                      | 18.0% (3.1%)       | 16.9% ( 1.3%)           | 6.9% (2.0%)            |
| UTR3 reads %, mean (std)                     | 15.6% (3.1%)       | 22.5% (1.7%)            | 11.4% (2.5)            |
| UTR5 reads %, mean (std)                     | 3.2% (0.7%)        | 2.2% (0.3%)             | 2.6% (0.7%)            |
| UTR** reads %, mean (std)                    | 4.3% (0.8%)        | 5.9% (0.5%)             | 1.9% (0.6%)            |
| Intronic reads %, mean (std)                 | 5.6% (1.6%)        | 4.4% (0.8%)             | 39.4% (6.5%)           |
| Proximate inter-genic*** reads %, mean (std) | 1.2% (0.6%)        | 1.5% (0.6%)             | 3.3% (0.4%)            |
| Deep inter-genic reads**** %, mean (std)     | 0.3% (0.1%)        | 0.3% (0.1%)             | 2.8% (0.9%)            |
| Mitochondrial (MT) reads %*, mean (std)      | 2.3% (1.0%)        | 4.3% (1.3%)             | 1.5% (1.8%)            |
| Multi-mapped reads %, mean (std)             | 10.6% (2.4%)       | 1.9% (0.2%)             | 1.9% (0.5%)            |
| Fusion reads %, mean (std)                   | 0.2% (0.1%)        | 0.4 % (0.1%)            | 0.7% (0.2%)            |

Notes :

\* percentage from the total number of reads are reported

\*\* reads simultaneously overlapping UTR3 and UTR5 regions

\*\*\* mapped with the 1K proximity from gene boundaries

\*\*\*\* mapped further than 1K from the gene boundaries

**B. Genomic profile obtained based on lost human reads. Lost human reads are the unmapped RNA-Seq reads that aligned to the human reference genome and transcriptome (ENSEMBL hg19 build, ENSEMBL GRCh37 transcriptome) via more sensitive Megablast alignment.**

| Tissue                                       | Whole blood        | Nasal epithelium   | Lung epithelium |
|----------------------------------------------|--------------------|--------------------|-----------------|
| N                                            | 19                 | 19                 | 49              |
| Library preparation method                   | poly(A) enrichment | poly(A) enrichment | ribo-depletion  |
| Splice junction reads, %*, mean (std)        | 1.5% (0.5%)        | 0.7% (0.1%)        | 0.6% (0.2%)     |
| CDS reads %, mean (std)                      | 1.9% (0.7%)        | 0.7% (0.1%)        | 0.7% (0.2%)     |
| UTR3 reads %, mean (std)                     | 1.3% (0.3%)        | 0.9% (0.1%)        | 1.1% (0.2%)     |
| UTR5 reads %, mean (std)                     | 0.4% (0.1%)        | 0.2% (0.03%)       | 0.3% (0.1%)     |
| UTR** reads %, mean (std)                    | 0.4% (0.1%)        | 0.2% (0.1%)        | 0.2% (0.1%)     |
| Intronic reads %, mean (std)                 | 1.0% (0.4%)        | 1.3% ( 1.1%)       | 5.9% (3.1%)     |
| Proximate inter-genic*** reads %, mean (std) | 0.6% (0.4%)        | 1.0% (1.1%)        | 2.1% (2.5%)     |
| Deep inter-genic reads**** %, mean (std)     | 0.2% (0.1%)        | 0.3% (0.3%)        | 0.7% (0.4%)     |
| Mitochondrial (MT) reads %*, mean (std)      | 0.0% (0.0%)        | 0.0% (0.0%)        | 0.0% (0.0%)     |

Notes :

\* percentage from the total number of reads are reported

\*\* reads simultaneously overlapping UTR3 and UTR5 regions

\*\*\* mapped with the 1K proximity from gene boundaries

\*\*\*\* mapped further than 1K from the gene boundaries

**Supplementary Table 3. Repeat profile across tissues types and library preparation methods. Repeat profile is obtained based on both mapped and lost repeat reads**

**A. Repeat profile obtained based on mapped RNA-Seq reads. Mapped reads were categorized based on the overlap with the repeat instances prepared from RepeatMasker annotation (Repeatmasker v3.3, Repeat Library 20120124).**

| Tissue                     | Whole blood | Nasal epithelium | Lung epithelium |
|----------------------------|-------------|------------------|-----------------|
| N                          | 19          | 19               | 49              |
|                            | poly(A)     | poly(A)          |                 |
| Library preparation method | enrichment  | enrichment       | ribo-depletion  |
| L1, %*, mean               | 0.4%        | 0.5%             | 5.5%            |
| L2, %, mean                | 0.2%        | 0.2%             | 1.0%            |
| CR1, %, mean               | 0.02%       | 0.01%            | 0.1%            |
| Alu, %, mean               | 1.0%        | 1.0%             | 2.5%            |
| MIR, %, mean               | 0.1%        | 0.1%             | 0.6%            |
| ERV1-MaLR, %, mean         | 0.2%        | 0.2%             | 1.1%            |
| ERV1, %, mean              | 0.2%        | 0.2%             | 0.8%            |
| ERVK, %, mean              | 0.0%        | 0.0%             | 0.1%            |
| ERV1, %, mean              | 0.1%        | 0.1%             | 0.5%            |
| RNA, %, mean               | 0.0%        | 0.0%             | 0.2%            |
| hAT-Charlie, %, mean       | 0.1%        | 0.1%             | 0.4%            |
| TcMar-Tigger, %, mean      | 0.04%       | 0.1%             | 0.5%            |
| Others, %, mean            | 0.05%       | 0.1%             | 0.3%            |

\* Percentage from the total number of reads

**B. Repeat profile obtained based on lost repeat reads. Lost human reads are the unmapped RNA-Seq reads that aligned to human reference genome and transcriptome (ENSEMBL hg19 build, ENSEMBL GRCh37 transcriptome) via more sensitive Megablast alignment.**

| <b>Tissue</b>              | <b>Whole blood</b>    | <b>Nasal epithelium</b> | <b>Lung epithelium</b> |
|----------------------------|-----------------------|-------------------------|------------------------|
| N                          | 19                    | 19                      | 49                     |
| Library preparation method | poly(A)<br>enrichment | poly(A)<br>enrichment   | ribo-depletion         |
| %, mean*                   |                       |                         |                        |
| hAT, mean                  | 0.0001%               | 0.0004%                 | 0.0000%                |
| TcMar-Mariner, mean        | 0.0001%               | 0.0005%                 | 0.0001%                |
| TcMar-Tigger, mean         | 0.0001%               | 0.0015%                 | 0.0001%                |
| L1, mean                   | 0.0045%               | 0.1409%                 | 0.0048%                |
| ERVk, mean                 | 0.0002%               | 0.0026%                 | 0.0001%                |
| ERV, mean                  | 0.0017%               | 0.0082%                 | 0.0014%                |
| ERV1, mean                 | 0.0025%               | 0.0106%                 | 0.0016%                |
| ERVL, mean                 | 0.0000%               | 0.0014%                 | 0.0000%                |
| Satellite, mean            | 0.0001%               | 0.0006%                 | 0.0000%                |
| Alu, mean                  | 0.0495%               | 0.0896%                 | 0.0382%                |
| Deu, mean                  | 0.0001%               | 0.0024%                 | 0.0001%                |
| Others, mean               | 0.0051%               | 0.0072%                 | 0.0025%                |

\*Percentage from the total number of reads

**Supplementary Table 4. Relative genomic abundance of microbial taxa at different levels of taxonomic classification after removal of reads with human origin (average over all samples of the tissue). Taxonomic classification is performed using Metaphlan2, which is able to assign the filtered unmapped reads to the microbial marker genes.**

| <b>Tissue</b>              | <b>Whole blood</b> | <b>Nasal epithelium</b> | <b>Lung epithelium</b> |
|----------------------------|--------------------|-------------------------|------------------------|
| N                          | 19                 | 19                      | 49                     |
| Library preparation method | poly(A) enrichment | poly(A) enrichment      | ribo-depletion         |
| <b>Phylum</b>              |                    |                         |                        |
| Proteobacteria             | 0.0%               | 0.9%                    | 100.0%                 |
| Actinobacteria             | 0.0%               | 99.1%                   | 0.0%                   |
| <b>Class</b>               |                    |                         |                        |
| Betaproteobacteria         | 0.0%               | 0.5%                    | 86.7%                  |
| Gammaproteobacteria        | 0.0%               | 0.5%                    | 13.3%                  |
| Actinobacteria             | 0.0%               | 98.9%                   | 0.0%                   |
| <b>Order</b>               |                    |                         |                        |
| Burkholderiales            | 0.0%               | 0.0%                    | 87.0%                  |
| Enterobacteriales          | 0.0%               | 0.0%                    | 12.0%                  |
| Actinomycetales            | 0.0%               | 99.5%                   | 0.0%                   |
| Pseudomonadales            | 0.0%               | 0.5%                    | 1.0%                   |

**Supplementary Table 5. Number of RNA-Seq reads mapped to BCR and TCR genes (immune reads). Reads entirely mapped to BCR and TCR genes are identified by tophat2. Reads with extensive somatic hyper mutations (SHM) and reads arising from V(D)J recombination are identified by IgBlast.**

| <b>Tissue</b>                               | <b>Whole blood</b> | <b>Nasal epithelium</b> | <b>Lung epithelium</b> |
|---------------------------------------------|--------------------|-------------------------|------------------------|
| N                                           | 19                 | 19                      | 49                     |
| Library preparation method                  | poly(A) enrichment | poly(A) enrichment      | ribo-depletion         |
| Number of immune reads (tophat2), RPM, mean | 4805               | 107                     | 16                     |
| Number of immune reads (IgBlast), RPM, mean | 270                | 7                       | 1                      |
| Total number of immune reads , RPM, mean    | 5075               | 114                     | 17                     |

RPM : reads per million
